# Supplementary material for: Synthesis and near-infrared fluorescence of K5NdLi2F10 nanocrystals and their dispersion with high doping concentration and long lifetime
Source: Royal Society of Chemistry journal article supplement (doi:10.1039/c3nr06825k), 2014-01-01
Supplement: c3nr06825k1.pdf [file c3nr06825k1.pdf]

## Supplementary Information for:

### Synthesis and Near-infrared Fluorescence of $K_5NdLi_2F_{10}$

### Nanocrystals and Its Dispersion with High Doping

### Concentration and Long Lifetime

Weikuan Duan,<sup>a,c</sup> Yanyan Zhang,<sup>a,c</sup> Zhongyue Wang,<sup>a</sup> Jingyi Jiang,<sup>a</sup> Chen Liang,<sup>a</sup> and Wei Wei<sup>b,\*</sup>

<sup>a</sup> Institute of Advanced Materials, Nanjing University of Posts and Telecommunications, Nanjing, Jiangsu, 210023, P.R. China.

<sup>b</sup> School of Optoelectronic Engineering, Nanjing University of Posts and Telecommunications, Nanjing, Jiangsu, 210023, P.R. China. E-mail: [iamww@fudan.edu.cn](mailto:iamww@fudan.edu.cn)

#### S1. Fitting curve of refractive index

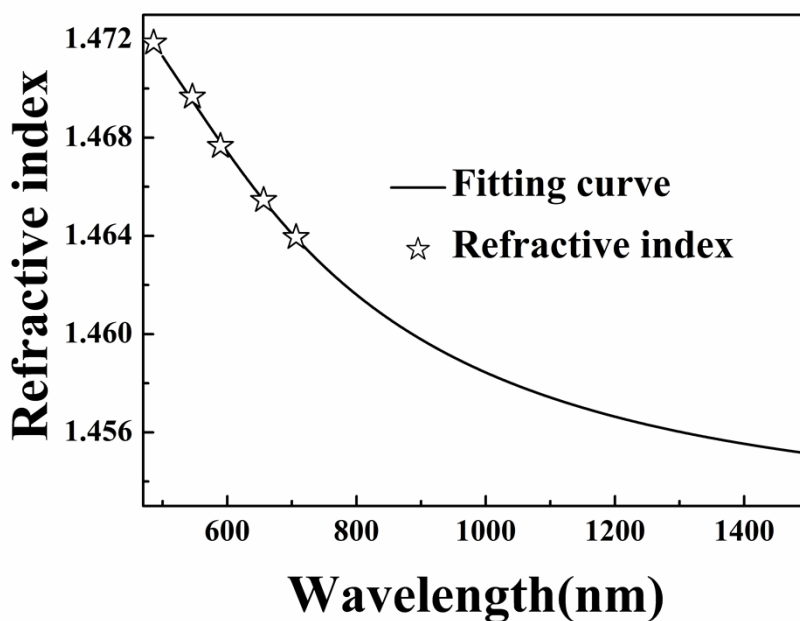

**Figure S1.** fitting curve of refractive index for  $K_5NdLi_2F_{10}$  nanocrystals dispersion in PEG400

Figure S1 shows the fitting curve of refractive index for  $K_5NdLi_2F_{10}$  nanocrystals dispersion in PEG-400, which was measured on WYV-V-prismrefractometer. The

experimental data was analyzed by soft of MATrix LABoratory. We could get the refractive index at 1048 nm was 1.4579.

## S2. Judd-Ofelt calculation

Based on the absorption spectrum which was shown in the inset picture of **Figure 7**, there are five transitions corresponding to transitions from  $^4I_{9/2}$  ground state manifold to various excited states. The experimental oscillator strengths ( $f_{exp}$ ) of each electronic transition of  $Nd^{3+}$  can be evaluated by the following Equation S1<sup>1</sup>:

$$f_{exp} = \frac{mc^2}{\pi e^2 N \lambda^2} \int \alpha(\lambda) d\lambda \quad (1)$$

Where  $m$  and  $e$  are electron mass and charge,  $c$  is the velocity of light,  $N$  is the number density of  $Nd^{3+}$  ions, and  $\alpha(\lambda)$  is the absorption coefficient. According to Judd-Ofelt theory, the calculated oscillator strengths ( $f_{cal}$ ) of electronic transitions from the ground state ( $aJ$ ) level to the excited state ( $bJ'$ ) level are given by the Equation S2<sup>2</sup>:

$$f_{cal}(aJ, bJ') = \frac{8\pi^2 mc}{3h\lambda(2J+1)} \frac{(n^2 + 2)^2}{9n} \sum_{t=2,4,6} \Omega_t \left| \langle aJ \| U^{(t)} \| bJ' \rangle \right|^2 \quad (2)$$

Where  $n$  is the refractive index of the host,  $h$  is the Planck constant,  $2J+1$  is the degeneracy of the ground state.  $|\langle aJ \| U^{(t)} \| bJ' \rangle|^2$  represents the reduced matrix elements that are insensitive to the local environment, and those values for  $Nd^{3+}$  ions given by *Carnall et al* were used in the calculations<sup>[3,4]</sup>. The values of three Judd-Ofelt parameters  $\Omega_t$  (2, 4, 6) were provided by a least-squares fitting of  $f_{exp}$  to  $f_{cal}$ . According to the Judd-Ofelt formulae described, measured oscillator strengths ( $f_{exp}$ ), calculated

oscillator strengths ( $f_{cal}$ ) and Judd-Ofelt parameters  $\Omega_t$  of  $K_5NdLi_2F_{10}$  nanocrystals were determined (Listed in Table S1).

**Table S1.** Observed absorption peak positions, integrated absorption coefficient, measured oscillator strengths ( $f_{exp}$ ), calculated oscillator strengths ( $f_{cal}$ ) and Judd-Ofelt parameters of the  $K_5NdLi_2F_{10}$  nanocrystal dispersion <sup>a</sup>.

| Electronic transition<br>(from $4I_{9/2}$ ) | Absorption peak<br>(nm) | Absorption coefficient<br>$\int \alpha(\lambda) d\lambda (10^{-7})$ | Oscillator strength<br>$f_{exp} (10^{-6} \text{ cm}^2)$ | Oscillator strength<br>$f_{cal} (10^{-6} \text{ cm}^2)$ |
|---------------------------------------------|-------------------------|---------------------------------------------------------------------|---------------------------------------------------------|---------------------------------------------------------|
| $4G_{7/2} + 4G_{9/2} + 2K_{13/2}$           | 521                     | 14.20691                                                            | 4.55085                                                 | 4.45444                                                 |
| $4G_{5/2} + 2G_{7/2}$                       | 576                     | 19.46721                                                            | 5.10968                                                 | 6.70554                                                 |
| $4F_{7/2} + 4S_{3/2}$                       | 743                     | 23.68136                                                            | 3.73563                                                 | 4.27054                                                 |
| $4F_{5/2} + 4H_{9/2}$                       | 800                     | 24.98455                                                            | 3.39959                                                 | 5.33955                                                 |
| $4F_{3/2}$                                  | 866                     | 17.88561                                                            | 2.07492                                                 | 2.56509                                                 |
| $\Omega_2 (\times 10^{-20} \text{ cm}^2)$   |                         |                                                                     | 1.153                                                   |                                                         |
| $\Omega_4 (\times 10^{-20} \text{ cm}^2)$   |                         |                                                                     | 6.174                                                   |                                                         |
| $\Omega_6 (\times 10^{-20} \text{ cm}^2)$   |                         |                                                                     | 2.997                                                   |                                                         |

<sup>a</sup> Based on absorption data from  $K_5NdLi_2F_{10}$ .

From the Judd-Ofelt parameters  $\Omega_t$  obtained above, the radiative transition rates for electronic dipole transitions between an excited state and the lower lying levels can be calculated by the following Equation S3 <sup>5</sup>:

$$A(aJ, bJ') = \frac{64\pi^4 e^2 n^2 \chi}{3h\lambda^3 (2J+1)} \sum_{t=2,4,6} \Omega_t \left| \left\langle 4f^N aJ \left\| U^{(t)} \right\| 4f^N bJ' \right\rangle \right|^2 \quad (3)$$

The radiative lifetime of the  $4F_{3/2}$  state is related to the radiative decay rate through following Equation S4 <sup>6</sup>:

$$\tau_r(a) = \frac{1}{A_{ed}(a)} = \frac{1}{\sum_b A_{ed}(ab)} \quad (4)$$

The quantum efficiency ( $\phi$ ) of the emission bands can be evaluated from the

following Equation S5 7:

$$\varphi = \frac{\tau_{mea}}{\tau_{rad}} \quad (5)$$

The emission spectra of  $K_5NdLi_2F_{10}$  nanocrystals in PEG-400 shows three emission bands centered at 865, 1048, and 1332 nm. The fluorescence branching ratios of these bands, radiative transition probability ( $A_{rad}$ ) between the excited states, and radiative lifetime of an emitting state were presented in Table S2.

**Table S2.** Observed emission bands, their measured and calculated radiative properties of  $K_5NdLi_2F_{10}$  <sup>a</sup>

| Transition from ${}^4F_{3/2}$ | Wavelength (nm) | $A_{rad}(s^{-1})$ | $\beta_{exp}(\%)$ | $\tau_{cal}(\mu s)$ |
|-------------------------------|-----------------|-------------------|-------------------|---------------------|
| ${}^4I_{13/2}$                | 1332            | 1223.58           | 5.91774           | 441.274             |
| ${}^4I_{11/2}$                | 1048            | 908.478           | 40.0888           |                     |
| ${}^4I_{9/2}$                 | 865             | 134.106           | 53.9935           |                     |

<sup>a</sup> Based on emission data from  $K_5NdLi_2F_{10}$  nanocrystals dispersion in PEG400.

In this work, a lifetime of 174.6  $\mu s$  was measured for the  ${}^4F_{3/2} \rightarrow {}^4I_{11/2}$  transition of  $K_5NdLi_2F_{10}$  nanocrystals dispersion in PEG-400 that was confirmed by the radiative lifetime and the fluorescence branching ratios of  ${}^4F_{3/2} \rightarrow {}^4I_{11/2}$  transition. According to the function (5), the emission quantum yield is deduced to be as high as 39.57 %.

## References

1. H. Lin, E. Y. B. Pun and S. Q. Man, *J. Opt. Soc. Am. B*, 2000, **18**, 602.
2. S. T. Tanabe, T. Ohyaigi and N. Soga, *Phys. Rev. B*, 1992, **46**, 3305.
3. W. T. Carnall, P. R. Fields and B. G. Wybourne, *J. Chem. Phys.*, 1968, **42**, 3797.

4. W. T. Carnall, P. R. Fields and K. Rajnak, *J. Chem. Phys.*, 1968, **49**, 4412.
5. X. X. Cui, J. B. Lu, C. Gao, C. Q. Hou, W. Wei and B. Peng, *Appl. Phys. A*, 2011, **103**, 27.
6. G. A. Kumar, A. Martinez and E. D. L. Rosa, *J. Lumin.*, 2002, **99**, 141.
7. G. A. Kumar, C. W. Chen and R. E. Riman, *J. Nanosci. Nanotechnol.*, 2008, **8**, 6558.
